# Supplementary material for: Innovative surfactant-free synthesis of core–shell SiO 2 /ZnO particles: rapid ultrasonication and photocatalytic inhibition
Source: Royal Society of Chemistry journal article supplement (doi:10.1039/d4ra01309c), 2024-01-01

## Graphical Abstracts

Facile ultrasonication method has been utilized to prepare the  $\text{SiO}_2/\text{ZnO}$  core-shell particle under the absence of surfactant material. The synthesis duration reduces to 75% shorter than the required by the common sol-gel. The photoluminescence (PL) properties of the produce particle exhibited several emission peaks around ultraviolet (UV) wavelength which indicate variations in the bandgap energy. In addition, the core-shell particles show higher UV A and UV B absorption by increasing the silica amount. The study also results in the reduced PL intensity by the presence of silica.

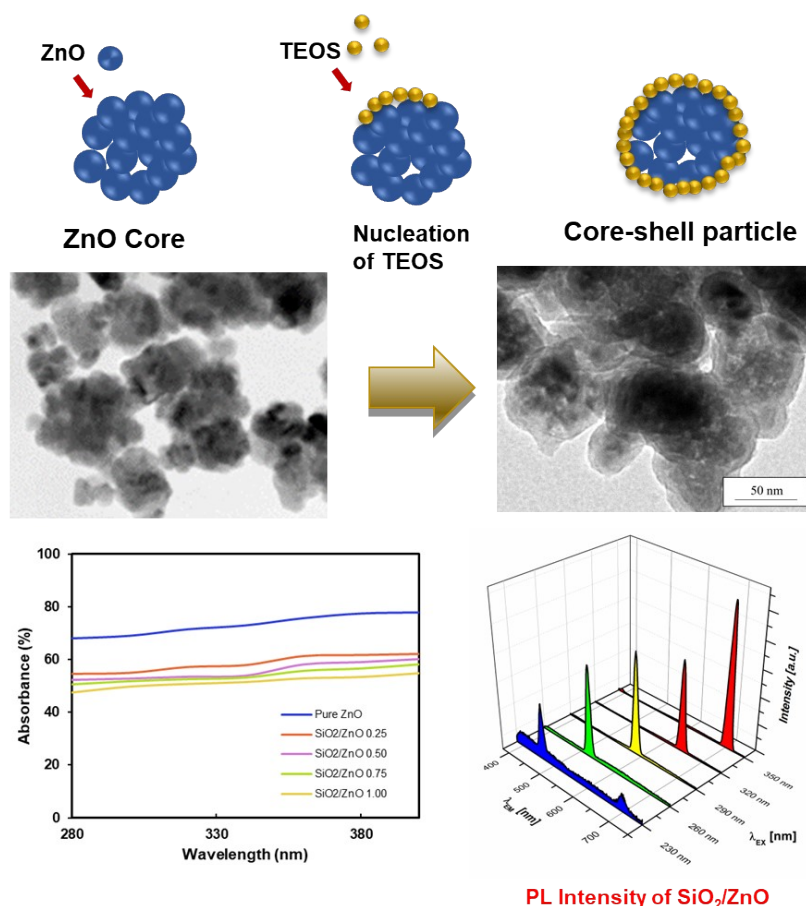

Supplement: d4ra01309c1.pdf [file d4ra01309c1.pdf]
